# Supplementary material
Source: PubMed Central journal article supplement (PMC4350144)
Supplement: Supp_Fig1.pdf [file Supp_Fig1.pdf]

## Supplementary Data

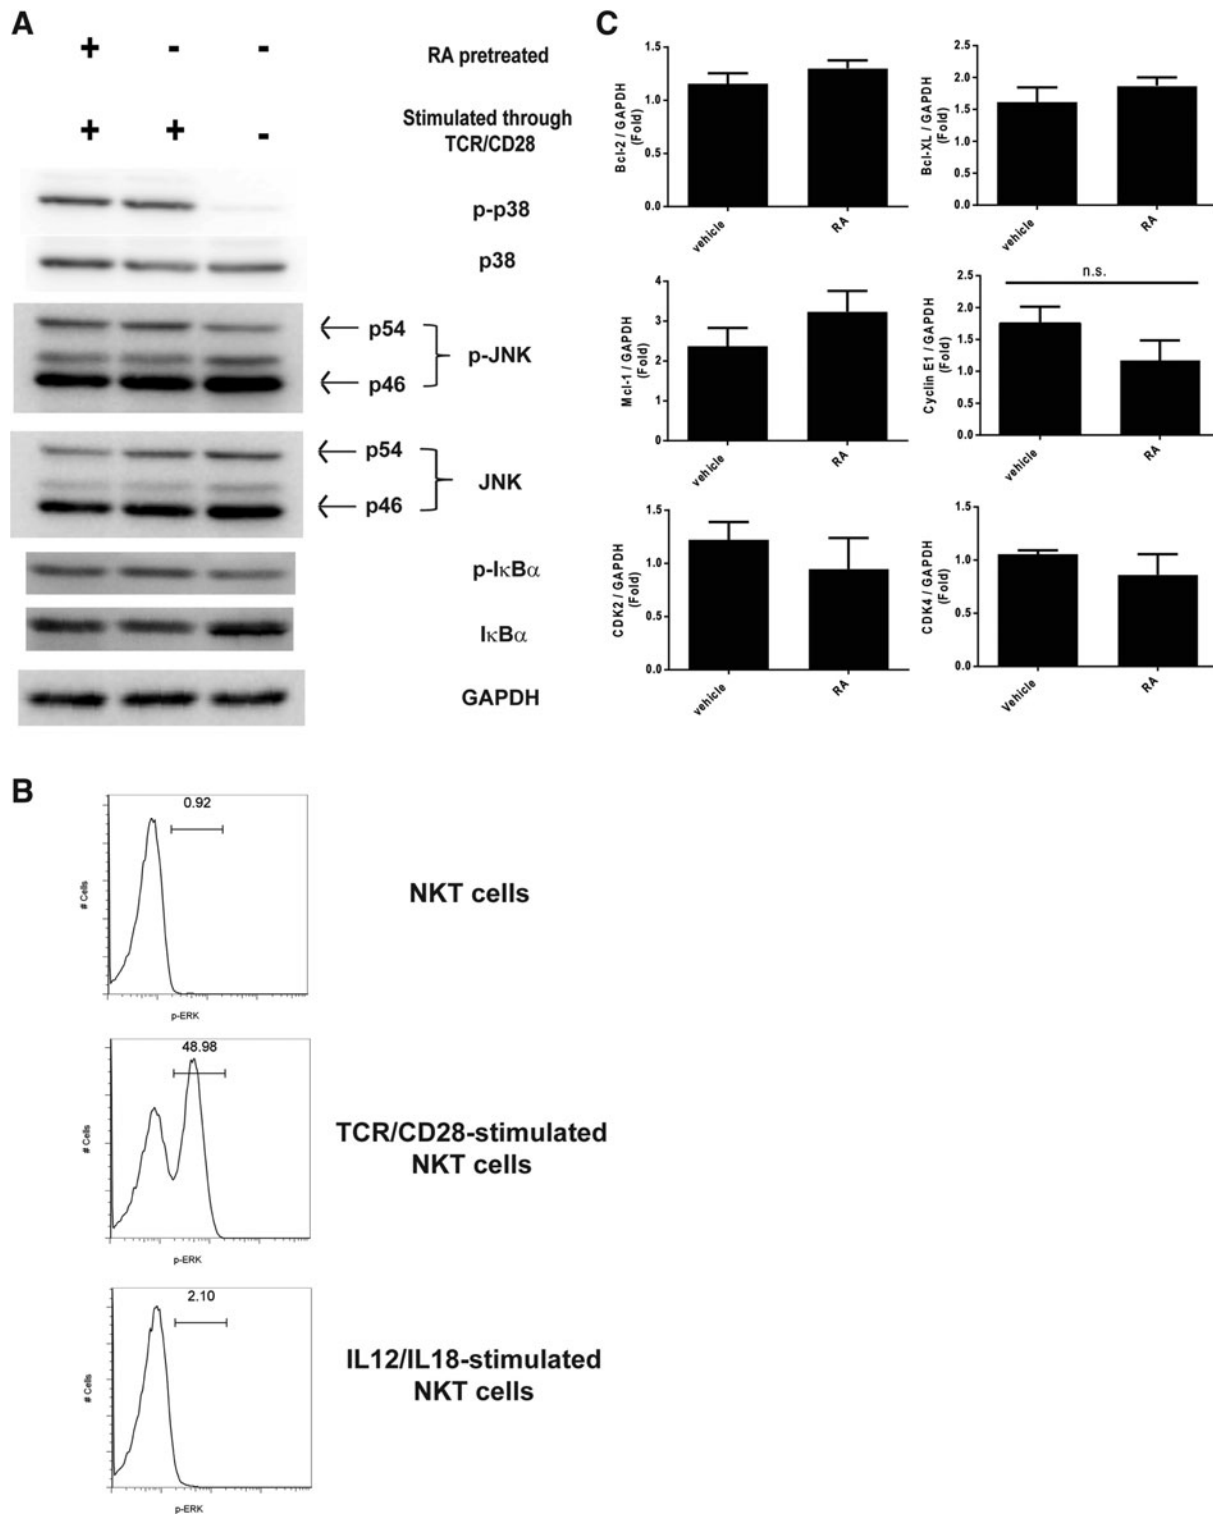

**SUPPLEMENTARY FIG. S1.** The involvement of extracellular signal-regulated kinase (ERK) signaling in the modulating effect of retinoic acid (RA) on interferon (IFN)- $\gamma$  production by T-cell receptor (TCR)/CD28-activated natural killer T (NKT) cells. **(A)** The p38, JNK, and NF- $\kappa$ B signaling in expanded NKT cells pretreated with the vehicle (*middle lane*) or RA (6  $\mu$ M) (*left lane*) and stimulated through TCR/CD28 by using plate-bound anti-CD3 antibodies (Abs) and soluble anti-CD28 Abs for 30 min. **(B)** The level of phospho-ERK (p-ERK) in NKT cells stimulated with anti-CD3 plus anti-CD28 Abs (TCR/CD28) or with IL-12 plus IL-18 (IL-12/IL-18). **(C)** Expression of downstream genes of ERK signaling in vehicle-treated or RA-treated NKT cells stimulated via CD3 and CD28 for 17 h. n.s., no significance.
